# Supplementary material
Source: publisher site journal article supplement (https://www.dovepress.com/get_supplementary_file.php?f=449337.docx)
Supplement: Supplementary file 1 [file get_supplementary_file.php]

**Supplement**

**List of e-Tables**

**e-Table 1.** Distribution of physical and psychiatric comorbidities of cases with self-harm and the controls derived from the asthma cohort from 1999 to 2013

**e-Table 2.** Use of medications within 12 months before the index date of cases with self-harm and the controls derived from the asthma cohort from 1999 to 2013 (cases: controls = 500: 5,000)

**e-Table 1.** Distribution of physical and psychiatric comorbidities of cases with self-harm and the controls derived from the asthma cohort from 1999 to 2013

|  | Case | Controls |  |  |  |
| --- | --- | --- | --- | --- | --- |
|  | (N=500) | (N=5000) |  |  |  |
| ***Characteristics*** | ***N (%)*** | ***N (%)*** | ***Unadjusted odds ratioa*** | ***95% CI*** | ***P-value*** |
| ***Physical Comorbidity*** |  |  |  |  |  |
| Cerebrovascular disease | 32 (6.4) | 217 (4.3) | 1.62 | 1.07-2.47 | 0.024 |
| Dementia | 9 (1.8) | 47 (0.9) | 2.03 | 0.96-4.31 | 0.066 |
| Chronic pulmonary disease | 187 (37.4) | 1626 (32.5) | 1.38 | 1.10-1.74 | 0.006 |
| Ulcer disease | 76 (15.2) | 523 (10.5) | 1.62 | 1.22-2.14 | <.001 |
| Cardiovascular disease | 162 (32.4) | 1338 (26.8) | 1.58 | 1.22-2.06 | <.001 |
| Cerebrovascular disease | 24 (4.8) | 156 (3.1) | 1.65 | 1.03-2.63 | 0.037 |
| Chronic hepatic disease | 50 (10.0) | 330 (6.6) | 1.62 | 1.17-2.24 | 0.004 |
| Pneumonia | 60 (12.0) | 402 (8.0) | 1.67 | 1.22-2.27 | 0.001 |
| COPD | 84 (16.8) | 649 (13.0) | 1.42 | 1.09-1.86 | 0.010 |
| ***Psychiatric Comorbidity*** |  |  |  |  |  |
| Any psychiatric disorder | 197 (39.4) | 998 (20.0) | 2.96 | 2.40-3.64 | <.001 |
| Alcohol-induced mental disorders | 10 (2.0) | 12 (0.2) | 9.85 | 3.97-24.46 | <.001 |
| Drug-induced mental disorders | 14 (2.8) | 28 (0.6) | 5.48 | 2.80-10.73 | <.001 |
| Schizophrenia | 10 (2.0) | 26 (0.5) | 3.96 | 1.89-8.30 | <.001 |
| Bipolar disorder | 25 (5.0) | 36 (0.7) | 7.27 | 4.31-12.24 | <.001 |
| Depressive disorder | 72 (14.4) | 136 (2.7) | 6.52 | 4.75-8.95 | <.001 |
| Anxiety states | 84 (16.8) | 375 (7.5) | 2.64 | 2.02-3.45 | <.001 |
| Personality disorder | 7 (1.4) | 3 (0.1) | 23.29 | 6.03-90.04 | <.001 |
| Adjustment reaction | 11 (2.2) | 16 (0.3) | 6.88 | 3.19-14.82 | <.001 |
| Hyperactivity disorder | 6 (1.2) | 25 (0.5) | 2.44 | 0.99-6.02 | 0.053 |
| Intellectual Disabilities | 1 (0.2) | 10 (0.2) | 1.00 | 0.13-7.96 | 1.00 |
| Sleep disorder | 112 (22.4) | 550 (11.0) | 2.58 | 2.02-3.30 | <.001 |

aEstimated using univariate conditional logistic regression.

**e-Table 2.** Use of medications within 12 months before the index date of cases with self-harm and the controls derived from the asthma cohort from 1999 to 2013 (cases: controls = 500: 5,000)

|  | Cases | Controls |  |  |  |
| --- | --- | --- | --- | --- | --- |
|  | (N=500) | (N=5,000) |  |  |  |
| ***Characteristics*** | ***N (%)*** | ***N (%)*** | ***Unadjusted odds ratioa*** | ***95% CI*** | ***P-value*** |
| ***Concomitant drugs*** |  |  |  |  |  |
| Cardiovascular drugs | 180 (36.0) | 1325 (26.5) | 2.10 | 1.63-2.72 | <.001 |
| Beta blocking agents | 118 (23.6) | 690 (13.8) | 2.26 | 1.76-2.92 | <.001 |
| Calcium channel blockers | 96 (19.2) | 785 (15.7) | 1.43 | 1.07-1.91 | 0.016 |
| Agents acting on the renin-angiotensin system | 63 (9.4) | 627 (12.5) | 1.01 | 0.94-1.38 | 0.965 |
| Lipid modifying agents | 36 (7.2) | 402 (8.0) | 0.88 | 0.60-1.27 | 0.483 |
| Respiratory drugs | 461 (92.2) | 4419 (88.4) | 1.58 | 1.12-2.23 | 0.009 |
| Nasal preparations | 277 (55.4) | 2484 (49.7) | 1.28 | 1.06-1.56 | 0.011 |
| Throat preparations | 0 (0.0) | 5 (0.1) | 0.00 | 0-. | 0.976 |
| Drugs for obstructive airway diseases | 335 (67.0) | 3031 (60.6) | 1.38 | 1.12-1.69 | 0.003 |
| Cough and cold preparations | 414 (82.8) | 4032 (80.6) | 1.17 | 0.91-1.50 | 0.228 |
| Antihistamines for systemic use | 422 (84.4) | 3729 (74.6) | 1.91 | 1.48-2.46 | <.001 |
| Drugs used in diabetes | 30 (6.0) | 359 (7.2) | 0.81 | 0.54-1.21 | 0.296 |
| Antithrombotic agents | 84 (16.8) | 647 (12.9) | 1.50 | 1.12-2.01 | 0.006 |
| Corticosteroids for systemic use | 221 (44.2) | 1693 (33.9) | 1.59 | 1.31-1.93 | <.001 |
| Anti-Parkinson drugs | 47 (9.4) | 171 (3.4) | 3.04 | 2.15-4.29 | <.001 |
| Mood stabilizers | 36 (7.2) | 105 (2.1) | 3.67 | 2.48-5.45 | <.001 |
| Antipsychotics | 73 (14.6) | 208 (4.2) | 4.07 | 3.04-5.44 | <.001 |
| Antidepressants | 112 (22.4) | 292 (5.8) | 5.24 | 4.04-6.78 | <.001 |
| Benzodiazepines |  |  |  |  |  |
| Short-acting | 117 (23.4) | 424 (8.5) | 3.79 | 2.95-4.87 | <.001 |
| Intermediate | 170 (34.0) | 760 (15.2) | 3.64 | 2.89-4.59 | <.001 |
| Long-acting | 236 (47.2) | 1302 (26.0) | 3.38 | 2.70-4.23 | <.001 |
|  |  |  |  |  |  |

aEstimated using univariate conditional logistic regression.
